# Supplementary material
Source: PubMed Central journal article supplement (PMC2981480)

**Table S1. Absolute numbers of hematopoietic cells in WT and Ptpn11<sup>D61G/+</sup> mice**

|                                                              | <b>WT</b>       | <b>Ptpn11<sup>D61G/+</sup></b> |
|--------------------------------------------------------------|-----------------|--------------------------------|
| <b>Total cellularity (both hind limbs) [x10<sup>7</sup>]</b> | <b>5.3±0.4</b>  | <b>5.0±0.4</b>                 |
| <b>LSK [x10<sup>4</sup>]</b>                                 | <b>7.8±0.5</b>  | <b>15.3±1.1***</b>             |
| <b>LT-HSC [x10<sup>3</sup>]</b>                              | <b>5.9±0.9</b>  | <b>11.5±0.6***</b>             |
| <b>ST-HSC [x10<sup>3</sup>]</b>                              | <b>14.2±2.0</b> | <b>28.2±5.1*</b>               |
| <b>CMP [x10<sup>4</sup>]</b>                                 | <b>9.18±1.4</b> | <b>11.5±2.4</b>                |
| <b>GMP [x10<sup>4</sup>]</b>                                 | <b>10.5±1.4</b> | <b>18.3±3.4*</b>               |
| <b>MEP [x10<sup>4</sup>]</b>                                 | <b>10.9±1.3</b> | <b>17.1±2.0*</b>               |
| <b>CLP [x10<sup>4</sup>]</b>                                 | <b>4.7±0.7</b>  | <b>2.5±0.3**</b>               |

Absolute numbers of the cells in various hematopoietic compartments in both hind limbs (femurs and tibias) (Mean ± SEM; \*,  $p < 0.05$ ; \*\*,  $p < 0.01$ ; \*\*\*,  $p < 0.001$  by unpaired, two-tailed Student's *t* test; n=10 per group).

**Table S2. Peripheral blood parameters in WT and *Ptpn11*<sup>D61G/+</sup> transplants**

|                                          | <b>WT</b>                       | <b><i>Ptpn11</i><sup>D61G/+</sup></b> |
|------------------------------------------|---------------------------------|---------------------------------------|
| <b>WBC (K/<math>\mu</math>l)</b>         | <b>16.1<math>\pm</math> 2.0</b> | <b>29.5<math>\pm</math>2.0*</b>       |
| <b>Neutrophils (K/<math>\mu</math>l)</b> | <b>6.9<math>\pm</math>1.0</b>   | <b>12.5<math>\pm</math>0.9 **</b>     |
| <b>Monocytes (K/<math>\mu</math>l)</b>   | <b>0.6<math>\pm</math>0.1</b>   | <b>1.2<math>\pm</math>0.2*</b>        |

Peripheral blood was analyzed by Hemavet 950F. Data are presented as mean  $\pm$  SEM. Statistical significance was determined by unpaired, two-tailed Student's *t* test; \*,  $p < 0.05$ ; \*\*,  $p < 0.01$ ;  $n = 3$  and  $7$  for WT and *Ptpn11*<sup>D61G/+</sup> groups, respectively.

**Table S3. Peripheral blood parameters in the competitive repopulation assay recipients**

|                                          | <b>WT:BoyJ</b>                    | <b>Ptpn11<sup>D61G/+</sup>:BoyJ</b> |
|------------------------------------------|-----------------------------------|-------------------------------------|
| <b>Neutrophils (K/<math>\mu</math>l)</b> | <b>4.8<math>\pm</math>1.2</b>     | <b>12.8<math>\pm</math>1.9**</b>    |
| <b>Monocytes (K/<math>\mu</math>l)</b>   | <b>0.5<math>\pm</math>0.1</b>     | <b>1.1<math>\pm</math>0.1*</b>      |
| <b>Lymphocytes (K/<math>\mu</math>l)</b> | <b>13.0<math>\pm</math>1.5</b>    | <b>8.9<math>\pm</math>0.5*</b>      |
| <b>Platelets (K/<math>\mu</math>l)</b>   | <b>466.6<math>\pm</math>110.0</b> | <b>742.2<math>\pm</math>202.0</b>   |
| <b>Hemoglobin (g/dL)</b>                 | <b>11.3<math>\pm</math>1.0</b>    | <b>10.6<math>\pm</math>0.4</b>      |

Peripheral blood was analyzed by Hemavet 950F. Data are presented as mean  $\pm$  SEM. Statistical significance was determined by unpaired, two-tailed Student's *t* test; \*,  $p < 0.05$ ; \*\*,  $p < 0.01$ ;  $n = 5$  per group).

**Table S4. Peripheral blood parameters in *Ptpn11<sup>D61G/+</sup>/Gab2<sup>-/-</sup>* mice**

|                                          | <b>WT</b>                       | <b>Gab2<sup>-/-</sup></b>       | <b>Ptpn11<sup>D61G/+</sup></b>  | <b>Ptpn11<sup>D61G/+</sup>Gab2<sup>-/-</sup></b> |
|------------------------------------------|---------------------------------|---------------------------------|---------------------------------|--------------------------------------------------|
| <b>Neutrophils (K/<math>\mu</math>l)</b> | <b>3.5<math>\pm</math>0.3</b>   | <b>4.4<math>\pm</math>0.7</b>   | <b>8.2<math>\pm</math>0.5</b>   | <b>5.4<math>\pm</math>0.7**</b>                  |
| <b>Monocytes (K/<math>\mu</math>l)</b>   | <b>0.4<math>\pm</math>0.1</b>   | <b>0.8<math>\pm</math>0.2</b>   | <b>1.3<math>\pm</math>0.1</b>   | <b>0.93<math>\pm</math>0.1*</b>                  |
| <b>Lymphocytes (K/<math>\mu</math>l)</b> | <b>9.0<math>\pm</math>0.7</b>   | <b>9.8<math>\pm</math>1.4</b>   | <b>6.0<math>\pm</math>0.9</b>   | <b>9.5<math>\pm</math>1.3*</b>                   |
| <b>Neutrophils (%)</b>                   | <b>31.4<math>\pm</math>4.8</b>  | <b>29.6<math>\pm</math>2.1</b>  | <b>53.7<math>\pm</math>2.1</b>  | <b>32.3<math>\pm</math>1.4***</b>                |
| <b>Lymphocytes(%)</b>                    | <b>58.0<math>\pm</math>4.4</b>  | <b>56.5<math>\pm</math>3.2</b>  | <b>34.4<math>\pm</math>3.0</b>  | <b>51.0<math>\pm</math>1.7***</b>                |
| <b>RBC (M/<math>\mu</math>l)</b>         | <b>10.4<math>\pm</math>0.4</b>  | <b>10.1<math>\pm</math>0.4</b>  | <b>10.5<math>\pm</math>0.7</b>  | <b>10.4<math>\pm</math>0.6</b>                   |
| <b>HCT (%)</b>                           | <b>48.1<math>\pm</math>2.8</b>  | <b>44.0<math>\pm</math>1.7</b>  | <b>47.0<math>\pm</math>2.9</b>  | <b>46.5<math>\pm</math>1.5</b>                   |
| <b>Hb (g/dL)</b>                         | <b>14.0<math>\pm</math>0.7</b>  | <b>14.7<math>\pm</math>0.5</b>  | <b>14.2<math>\pm</math>0.7</b>  | <b>14.8<math>\pm</math>0.8</b>                   |
| <b>Platelets (K/<math>\mu</math>l)</b>   | <b>439<math>\pm</math>120.0</b> | <b>594<math>\pm</math>115.0</b> | <b>582<math>\pm</math>137.0</b> | <b>424<math>\pm</math>46.0</b>                   |

Peripheral blood was analyzed by Hemavet 950F. Data are presented as mean  $\pm$  SEM. Statistical significance between *Ptpn11<sup>D61G/+</sup>/Gab2<sup>-/-</sup>* and *Ptpn11<sup>D61G/+</sup>* mice were determined by unpaired, two-tailed Student's *t* tests; \*,  $p < 0.05$ ; \*\*,  $p < 0.01$ ; \*\*\*,  $P < 0.001$ ;  $n = 8$  per group. Statistical significance among four groups was verified by one-way ANOVA followed by Tukey's post-test.

**Figure S1. MPD phenotypes are reproduced in secondary recipients.** BM cells

harvested from *Ptpn11*<sup>D61G/+</sup> and WT littermates were directly transplanted into lethally irradiated BoyJ mice as described in Figure 4. Sixteen weeks following the transplantation, BM cells were harvested and pooled from the primary recipients and transplanted into lethally irradiated BoyJ mice. Peripheral WBC (A and B), spleen weight (C), and percentages of donor-derived myeloid (Mac-1<sup>+</sup>Gr-1<sup>+</sup>) cells (D) in the BM of the secondary recipient mice were analyzed 18 weeks post secondary transplantation (n=5). (E) BM cells harvested from WT or *Ptpn11*<sup>D61G/+</sup> littermates were transplanted with the same number of BoyJ BM cells into lethally irradiated BoyJ mice. Sixteen weeks following the transplantation, BM cells were harvested and pooled from the primary recipients and transplanted into lethally irradiated BoyJ mice. WBC (E) and spleen (F) of the secondary recipient mice were examined 16 weeks post the secondary transplantation (n=5 per group).

**Figure S2. Cytokine hypersensitivity of *Ptpn11*<sup>D61G/+</sup> mutant LSK cells.** (A) LSK

cells ( $5 \times 10^3$ ) sorted from 4-6 months old WT and *Ptpn11*<sup>D61G/+</sup> mice were cultured in IL-3 (0 or 2 ng/ml) and 10% FBS-containing IMDM media for 7 days. Total cell numbers were determined (n=3 per group). (B and C) Percentages of myeloid (Mac-1<sup>+</sup>/Gr-1<sup>+</sup>) cells differentiated from the sorted LSK cells in the presence of IL-3 (2 ng/ml) were assessed by flow cytometry (n=8 per group). *P* values for comparisons between *Ptpn11*<sup>D61G/+</sup> and control cells were determined by Student's *t* tests.

**Figure S3. Enhanced GM-CSF-induced Erk activation in *Ptpn11*<sup>D61G/+</sup>**

**macrophages.** BM-derived macrophages were generated as described in Materials and Methods. The macrophages were starved in serum and cytokine-free medium for 5 hours and then stimulated with GM-CSF (10 ng/ml) for the indicated periods of time. Whole cell lysates were prepared and examined for Erk activation by immunoblotting with anti-phospho-Erk Ab. Blots were stripped and reprobated with anti-Erk to check protein loading.

**Figure S4. Absolute numbers of LSK cells are largely restored in the BM of**

***Ptpn11*<sup>D61G/+</sup>/*Gab2*<sup>-/-</sup> mice.** WT, *Gab2*<sup>-/-</sup>, *Ptpn11*<sup>D61G/+</sup>, and *Ptpn11*<sup>D61G/+</sup>/*Gab2*<sup>-/-</sup> mice were generated as described in Figure 6. The mice (n=6 per group) were analyzed for absolute numbers of LSK cells in BM as described in Figure 1. *P* values for comparisons between *Ptpn11*<sup>D61G/+</sup>/*Gab2*<sup>-/-</sup> and *Ptpn11*<sup>D61G/+</sup> mice were determined by Student's *t* tests.

**Figure S5. Gab1 and Gab3 levels are not significantly altered in *Gab2*<sup>-/-</sup> or**

***Ptpn11*<sup>D61G/+</sup>/*Gab2*<sup>-/-</sup> LSK cells.** LSK cells were sorted from WT, *Gab2*<sup>-/-</sup>, *Ptpn11*<sup>D61G/+</sup>, and *Ptpn11*<sup>D61G/+</sup>/*Gab2*<sup>-/-</sup> mice. RNA was extracted and real-time PCR was performed to determine mRNA levels of Gab1, Gab2, and Gab3.

**Figure S6. An important role of Gab2 in mediating the excessive myeloid**

**expansion induced by *Ptpn11*<sup>D61G</sup> mutation.** (A) Mouse Gab2 shRNA lentiviral plasmids were purchased from Open Biosystems (Huntsville, AL). Lentiviral vectors expressing Gab2 shRNAs were generated and used to infect mouse embryonic fibroblasts. Forty-eight hours after infection, RNA was extracted and real-time PCR was performed to determine Gab2 mRNA levels in the

infected cells. (B) BM cells harvested from 4-6 months old *Ptpn11*<sup>D61G/+</sup> mice were transduced with lentivirus expressing Gab2 shRNA-1 or control lentivirus. Transduced cells (GFP positive) were sorted by flow cytometry and assayed for CFU-GM ( $2 \times 10^4$ /ml) in the absence or presence of GM-CSF (0.1 ng/ml) or IL-3 (1 ng/ml) as described in Figure 6D, E. (C) Representative CFU-GM colonies from Gab2 shRNA-1 or control virus infected cells.

Figure S1

A

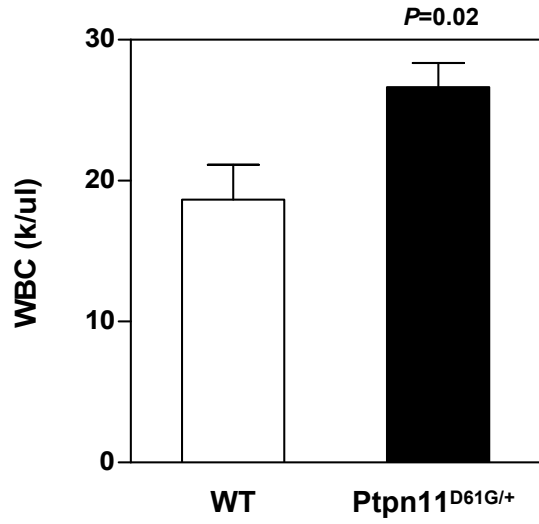

B

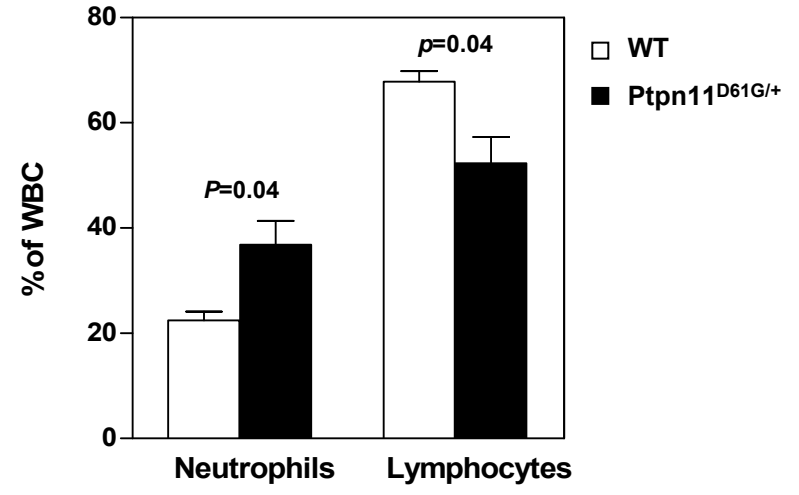

C

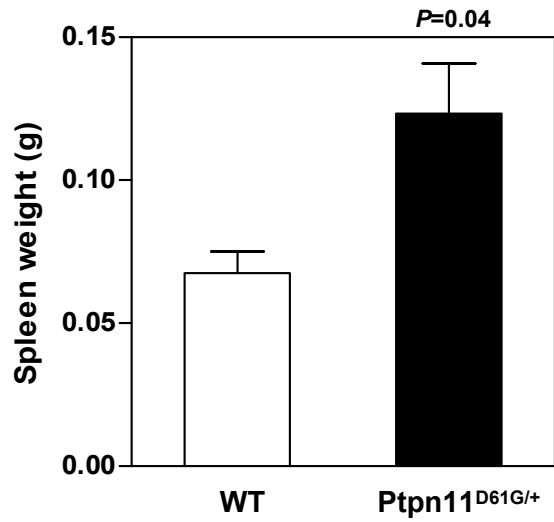

D

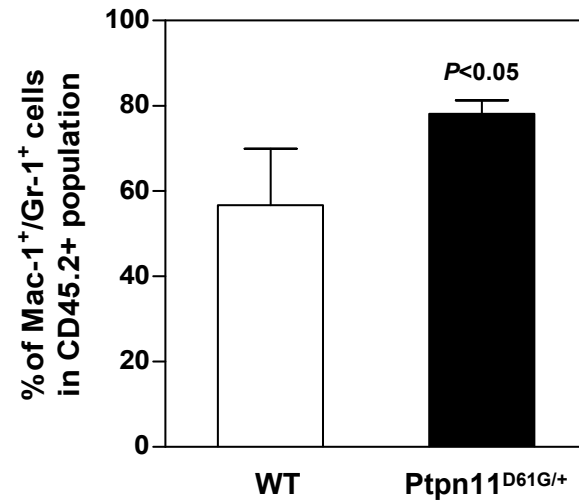



Figure S1

E

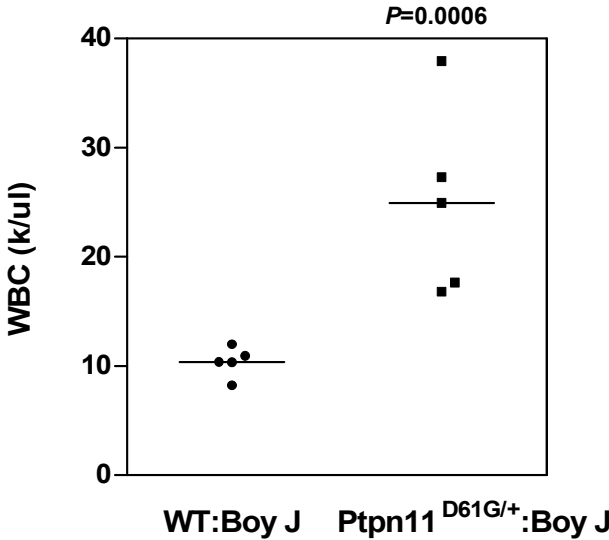

F

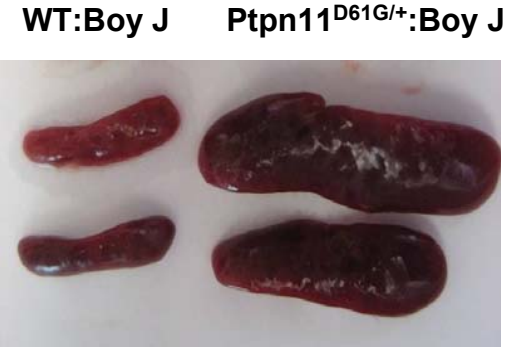

Figure S2

A

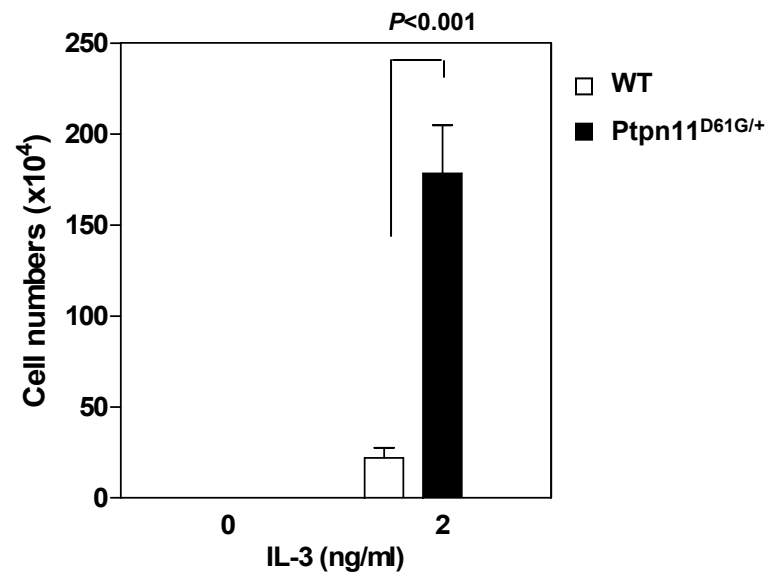

Figure S2

B

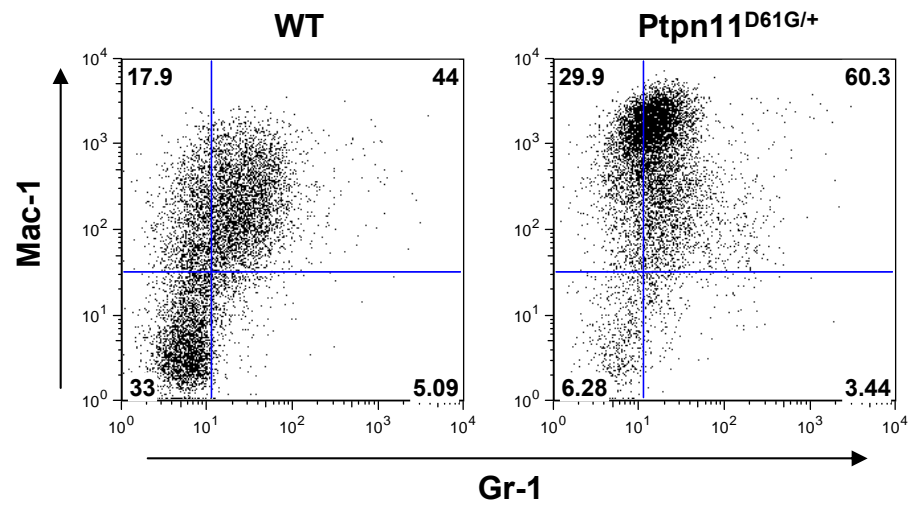

C

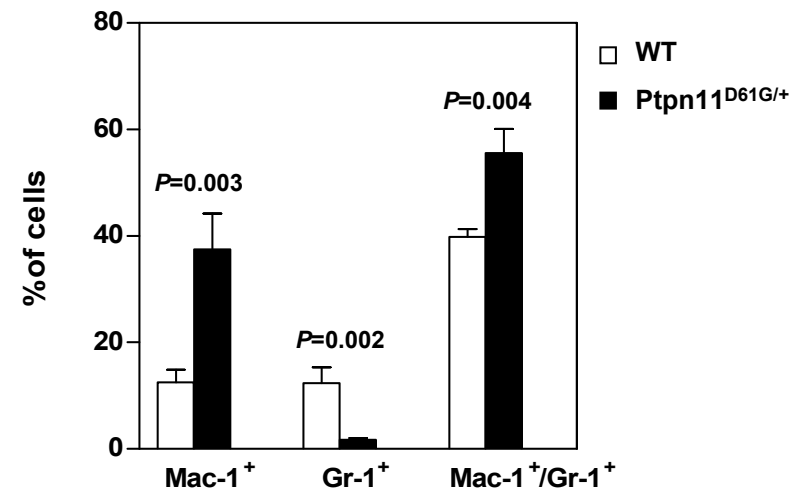



Figure S4

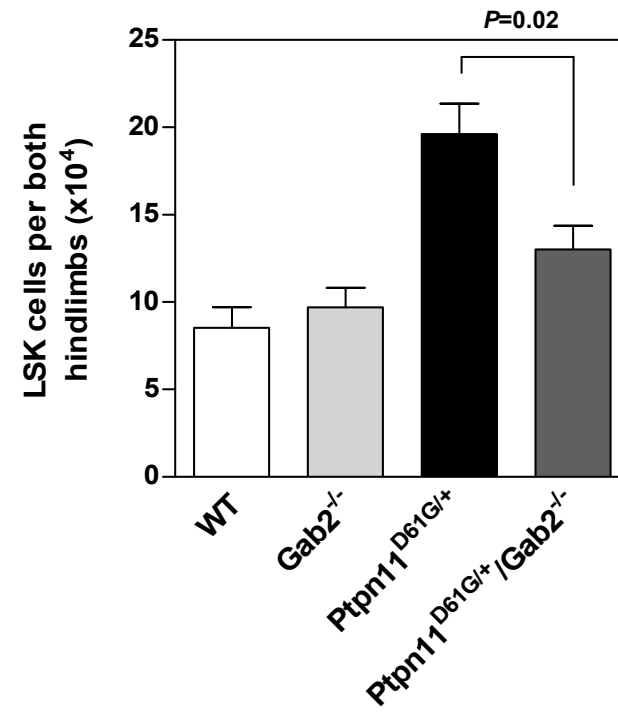

Figure S5

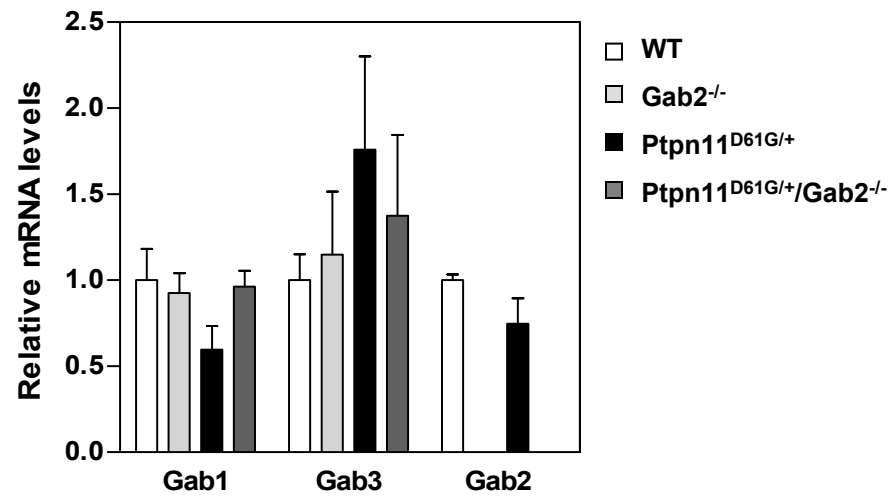

Figure S6

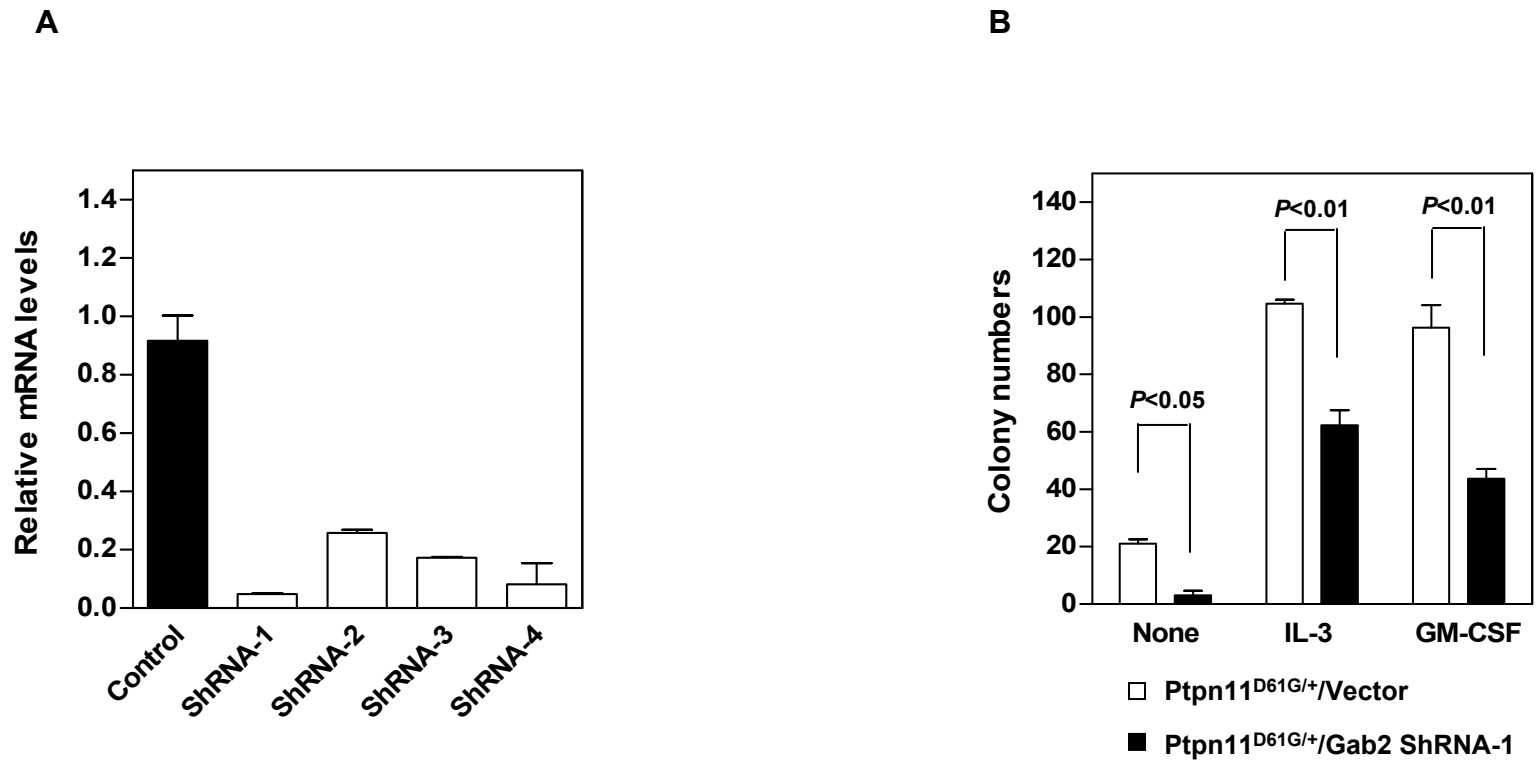

Figure S6

C

**Ptpn11<sup>D61G/+</sup>/Vector**

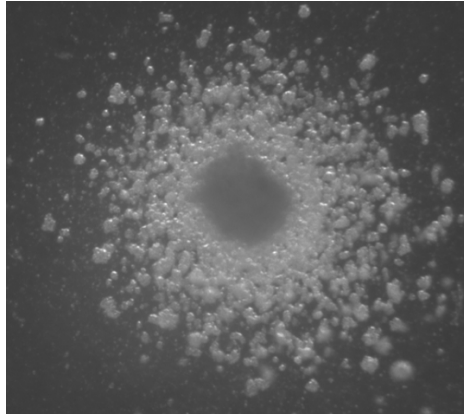

**Ptpn11<sup>D61G/+</sup>/Gab2 ShRNA-1**

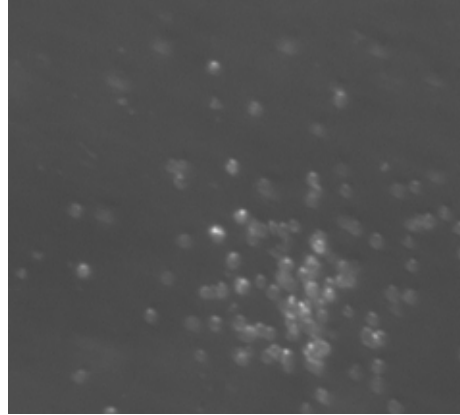

Supplement: blood-2010-01-265652_1.pdf [file blood-2010-01-265652_1.pdf]
